# Supplementary material
Source: publisher site journal article supplement (https://www.dovepress.com/article/351260)
Supplement: Supplementary file 1 [file get_supplementary_file.php]

## Supplementary material

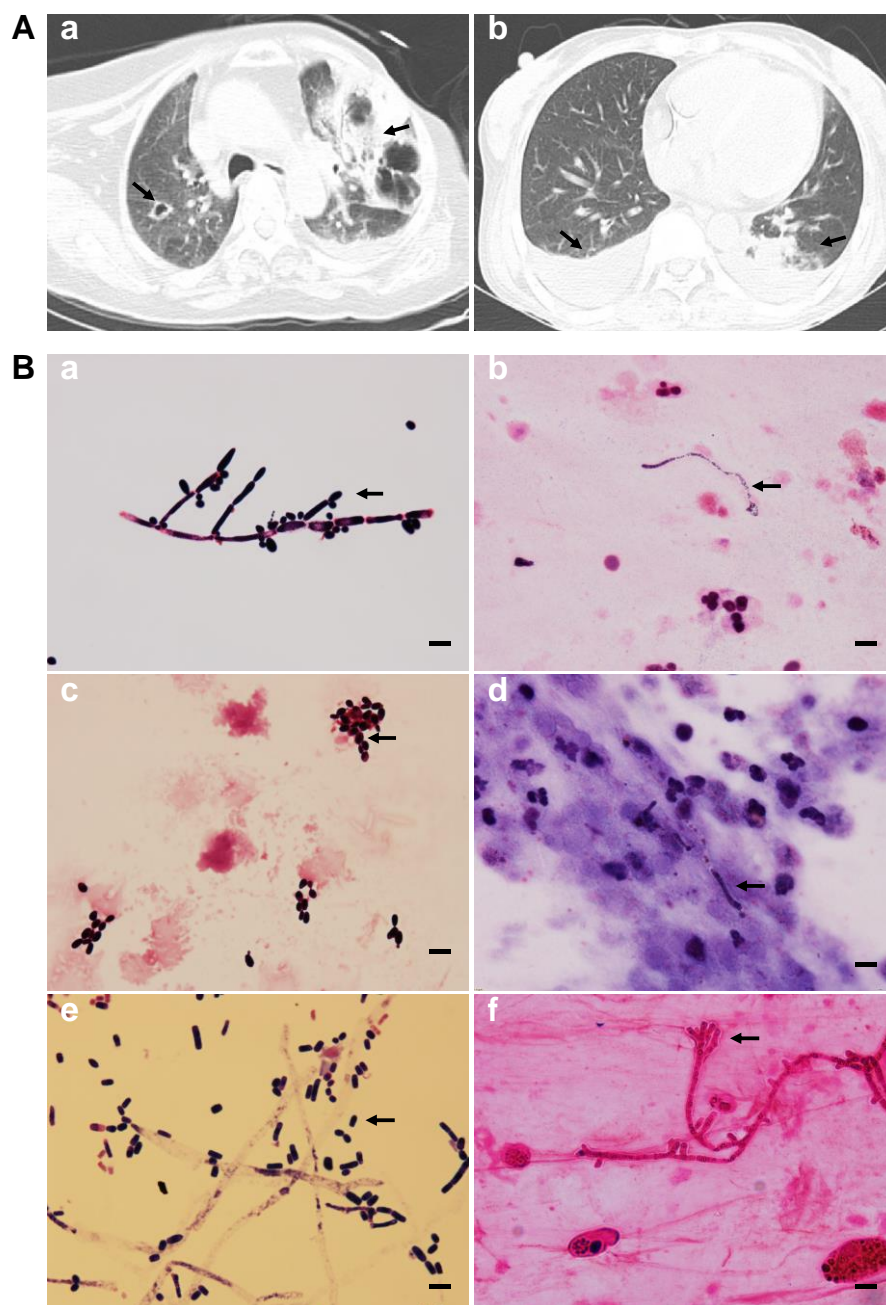

**Figure S1** Representative clinical and mycological features of patients with clinically diagnosed invasive fungal infections in the study. **(A)** Chest CT imaging data of patients with fungal pneumonia of *Aspergillus flavus* featured with ground-glass opacity, pulmonary nodular infiltration, cavity and air crescent sign. (a); or with pneumonia of *Candida tropicalis* with pulmonary inflammation and pleural effusion (b). **(B)** Gram staining data of the indicated fungal isolates; (a) *Candida albicans* from urogenital specimen, (b) *Candida albicans* from respiratory specimen, (c) *Candida glabrata* from urogenital specimen, (d) *Candida glabrata* from respiratory specimen, (e) *Trichosporon asahii* from urogenital specimen, and (f) *Aspergillus fumigatus* from respiratory specimen; scale bar: 10  $\mu$ m.
